# Supplementary material for: DegNorm: normalization of generalized transcript degradation improves accuracy in RNA-seq analysis
Source: Genome Biol. 2019 Apr 16;20:75. doi: 10.1186/s13059-019-1682-7 (PMC6466807; doi:10.1186/s13059-019-1682-7)
Supplement: Supplementary file 3 — Table S1. This table summarizes the number of false positives claimed in differential expression analysis by edgeR from different normalization methods at q value threshold = 0.05 for data sets including SEQC-AA, GBM RIN10 vs. RIN4, GBM RIN6 vs. RIN4, PBMC-S01, DLPFC Br1729 Ribo-zero, DLPFC Br1729 poly(A)+, and breast tumor FF vs. (XLSX 9 kb) [file 13059_2019_1682_MOESM3_ESM.xlsx]

## Sheet: Sheet1
	Number of flase positves at q-value<=0.05
	UQ	DegNorm	RUVr	TIN
SEQC-AA	0	5	2	6
RIN10vsRIN4	10973	8276	11669	8120
RIN6vsRIN4	1166	313	2779	1059
PBMC_S01	93	93	3423	36
Br1729-Ribo-Zero	1319	893	7162	932
Br1729-Poly(A)+	5153	1824	7177	1886
FFvsFFPE	695	679	1827	1648
